# Supplementary material for: Genome-Wide Effects of Long-Term Divergent Selection
Source: PLOS journal article supplement (doi:10.1371/journal.pgen.1001188), 2010-11-04
Supplement: S12 (10.1371/journal.pgen.1001188.s012) [file journal.pgen.1001188.s012]

|                            | <b>Generation 1-4</b> | <b>Generation 5-25</b> | <b>Generation 26-50</b> |
|----------------------------|-----------------------|------------------------|-------------------------|
| Selected males ( $N_m$ )   | 8                     | 12                     | 14                      |
| Selected females ( $N_f$ ) | 48                    | 48                     | 56                      |
| Effective population size  | 27.43                 | 38.40                  | 44.80                   |
| Low line males $p, (i)$    | 0.059 (1.985)         | 0.089 (1.804)          | 0.10 (1.755)            |
| Low line Females $p, (i)$  | 0.36 (1.039)          | 0.36 (1.039)           | 0.41 (0.948)            |
| High line males $p, (i)$   | 0.052 (2.063)         | 0.077 (1.887)          | 0.090 (1.804)           |
| High line females $p, (i)$ | 0.31 (1.138)          | 0.31 (1.138)           | 0.36 (1.039)            |
